# Supplementary material for: Safety of endoscopic pancreatic necrosectomy compared with percutaneous and surgical necrosectomy: a nationwide inpatient study
Source: PubMed Central journal article supplement — Endosc Int Open. 2023 Apr 4;11(4):E330–9. doi: 10.1055/a-1994-6214 (PMC10072924; doi:10.1055/a-1994-6214), 2023-04-04
Supplement: 2860supmat_10-1055-a-1994-6214.pdf [file 2860supmat_10-1055-a-1994-6214.pdf]

## Supplementary material

Supplementary Table 1

| Variable                                  | Total (n) | Mean | Standard Deviation | Standard Error |
|-------------------------------------------|-----------|------|--------------------|----------------|
| <b>Hemodialysis, Recieved Inpatient</b>   | 78.09     | 0.03 | 0.14               | 0.01           |
| Surgical Necrosectomy                     | 18.20     | 0.07 | 0.19               | 0.02           |
| Percutaneous Necrosectomy                 | 41.14     | 0.03 | 0.13               | 0.01           |
| Endoscopic Necrosectomy                   | 18.75     | 0.03 | 0.13               | 0.01           |
| <b>Transfusion of Blood Products</b>      | 269.82    | 0.12 | 0.25               | 0.01           |
| Surgical Necrosectomy                     | 51.06     | 0.19 | 0.30               | 0.04           |
| Percutaneous Necrosectomy                 | 177.33    | 0.13 | 0.26               | 0.01           |
| Endoscopic Necrosectomy                   | 41.42     | 0.06 | 0.18               | 0.01           |
| <b>Post Procedure Infection</b>           | 32.37     | 0.01 | 0.09               | 0.00           |
| Surgical Necrosectomy                     | *         | 0.02 | 0.10               | 0.01           |
| Percutaneous Necrosectomy                 | 23.33     | 0.02 | 0.10               | 0.00           |
| Endoscopic Necrosectomy                   | *         | 0.01 | 0.06               | 0.00           |
| *Less than 10 counts.                     |           |      |                    |                |
| <b>Post Procedure Anemia</b>              | 371.09    | 0.16 | 0.28               | 0.01           |
| Surgical Necrosectomy                     | 101.83    | 0.38 | 0.37               | 0.04           |
| Percutaneous Necrosectomy                 | 194.78    | 0.15 | 0.27               | 0.02           |
| Endoscopic Necrosectomy                   | 74.48     | 0.11 | 0.24               | 0.02           |
| <b>Acute Kidney Injury</b>                | 716.25    | 0.31 | 0.36               | 0.02           |
| Surgical Necrosectomy                     | 133.03    | 0.49 | 0.38               | 0.05           |
| Percutaneous Necrosectomy                 | 449.20    | 0.34 | 0.36               | 0.02           |
| Endoscopic Necrosectomy                   | 134.02    | 0.20 | 0.30               | 0.02           |
| <b>Post Procedure Respiratory Failure</b> | 31.09     | 0.01 | 0.09               | 0.00           |
| Surgical Necrosectomy                     | 12.86     | 0.05 | 0.16               | 0.02           |
| Percutaneous Necrosectomy                 | 18.24     | 0.01 | 0.09               | 0.01           |
| Endoscopic Necrosectomy                   | *         | 0.00 | 0.00               |                |
| *Less than 10 counts.                     |           |      |                    |                |
| <b>Ventilator Associated Pneumonia</b>    | 20.91     | 0.01 | 0.07               | 0.00           |
| Surgical Necrosectomy                     | *         | 0.02 | 0.10               | 0.01           |
| Percutaneous Necrosectomy                 | 15.15     | 0.01 | 0.08               | 0.00           |

## Supplementary material

|                                                                 |   |       |      |      |      |
|-----------------------------------------------------------------|---|-------|------|------|------|
| Endoscopic Necrosectomy                                         | * | 0.00  | 0.03 | 0.00 |      |
| *Less than 10 counts.                                           |   |       |      |      |      |
| <b>Unspecified complication of procedure, initial encounter</b> |   | 36.29 | 0.02 | 0.10 | 0.00 |
| Surgical Necrosectomy                                           |   | 11.27 | 0.04 | 0.15 | 0.02 |
| Percutaneous Necrosectomy                                       |   | 18.20 | 0.01 | 0.09 | 0.00 |
| Endoscopic Necrosectomy                                         | * | 0.01  | 0.08 | 0.01 |      |
| *Less than 10 counts.                                           |   |       |      |      |      |
